# Supplementary material
Source: MDPI journal article supplement (https://www.mdpi.com/2227-9717/11/1/161)
Supplement: s1 [file s1]

---

## Supplementary Materials

Real-time identification and positioning of sewer blockage based on liquid level analysis  
in rural area

**Table S1.** Summary table of liquid level change rate and fluctuation range of DN200 drainage pipeline under normal operation and after blocking

| Q(m <sup>3</sup> /h) | Liquid level change rate of DN200 drainage pipeline (mm/min) |                                  |                                        | The fluctuation range of DN200 drainage pipeline (mm) |                                            |                                                 |
|----------------------|--------------------------------------------------------------|----------------------------------|----------------------------------------|-------------------------------------------------------|--------------------------------------------|-------------------------------------------------|
|                      | Normal                                                       | Downstream of the blocking point | Upstream of the blocking point (DN150) | Normal (maximum fluctuation)                          | Downstream of the blocking point (minimal) | Upstream of the blocking point (DN150, minimum) |
| 0.5                  | (-30,28)                                                     | (-16~ -20)                       | (14~18)                                | 12.5—5.5                                              | 16.5—8.5                                   | 6—17                                            |
| 1                    | (-20,26)                                                     | (-16~ -22)                       | (18~30)                                | 19—11.5                                               | 17.5—8                                     | 10—29                                           |
| 1.5                  | (-24,16)                                                     | (-16~ -32)                       | (30~38)                                | 26—19.5                                               | 14—8.5                                     | 12—33                                           |
| 2                    | (-24,24)                                                     | (-14~ -24)                       | (36~48)                                | 24—19                                                 | 25—15.5                                    | 14—42                                           |
| 2.5                  | (-24,24)                                                     | (-12~ -20)                       | (46~48)                                | 28—18.5                                               | 25.5—17.5                                  | 17—50                                           |
| 3                    | (-28,20)                                                     | (-12~ -30)                       | (42~60)                                | 28—20                                                 | 30—19                                      | 18—45                                           |
| 3.5                  | (-24,26)                                                     | (-30~ -44)                       | (48~74)                                | 39—28                                                 | 27—13.5                                    | 20—48                                           |
| 4                    | (-22,18)                                                     | (-20~ -26)                       | (56~80)                                | 32—23                                                 | 29—19.5                                    | 23—62                                           |
| 4.5                  | (-24,32)                                                     | (-16~ -28)                       | (48~66)                                | 32—20.5                                               | 37—26                                      | 24—55                                           |
| 5                    | (-22,34)                                                     | (-24~ -30)                       | (46~74)                                | 37.5—31.5                                             | 36.5—22.5                                  | 26—58                                           |

**Table S2.** Results of blockage identification through upstream and downstream liquid level monitoring of DN150 and DN200 drainage pipes after blockage

| Q (m <sup>3</sup> /h) | Identification result of drainage pipe obstruction of DN150 |                                          |                                         | Identification result of drainage pipe obstruction of DN200 |                                    |                                          |
|-----------------------|-------------------------------------------------------------|------------------------------------------|-----------------------------------------|-------------------------------------------------------------|------------------------------------|------------------------------------------|
|                       | 1 m upstream of the blocking point                          | 29.55 m downstream of the blocking point | 60.4 m downstream of the blocking point | 24.85 m upstream of the blocking point                      | 4 m upstream of the blocking point | 26.85 m downstream of the blocking point |
| 0.5                   | √/√/√                                                       | √/√/√                                    | √/√/√                                   |                                                             | √/√/—                              | √/√/√                                    |
| 1                     | √/√/√                                                       | √/√/√                                    | √/√/√                                   |                                                             | √/√/√                              | √/√/√                                    |
| 1.5                   | √/√/√                                                       | √/√/—                                    | √/—/√                                   |                                                             | √/√/√                              | √/√/√                                    |
| 2                     | √/√/√                                                       | √/√/√                                    | √/√/√                                   |                                                             | √/√/√                              | √/√/√                                    |
| 2.5                   | √/√/√                                                       | √/√/√                                    | √/√/√                                   |                                                             | √/√/√                              | √/√/√                                    |
| 3                     | √/√/√                                                       | √/√/√                                    | √/√/√                                   |                                                             | √/√/√                              | √/—/√                                    |
| 3.5                   | √/√/√                                                       | √/√/√                                    | √/√/√                                   |                                                             | √/√/√                              | √/√/√                                    |
| 4                     | √/√/√                                                       | √/—/√                                    | √/√/√                                   |                                                             | √/√/√                              | √/√/—                                    |
| 4.5                   | √/√/√                                                       | √/√/√                                    | √/√/√                                   |                                                             | √/√/√                              | √/√/√                                    |
| 5                     | √/√/√                                                       | √/√/√                                    | √/√/√                                   |                                                             | √/√/√                              | √/—/√                                    |

1. √ in the table indicates that the blockage can be identified successfully, — indicates that the blockage cannot be identified.

2. √ / √ / √ means that 0.2 kg, 0.15 kg, and 0.1 kg obstructions cause drainage pipe blockage and can be identified.
